# Supplementary material
Source: publisher figshare collection journal article supplement (https://frontiersin.figshare.com/ndownloader/files/14738411)
Supplement: Supplementary file 1 [file 14738411]

**Table S3**. Private alleles encountered for the eight microsateliites markers studied in *Phymatolithon calcareum* beds.

| **Region** | **Site** | **Locus (number of private alleles)** |
| --- | --- | --- |
| BI | Zara Shoal | PC-2 (1), PC-7 (1) |
| Milford Haven | PC-1 (1) |
| Falmouth | PC-1 (1), PC-5 (1), PC-7 (1) |
| AF | Morlaix | — |
|  | Trevignon | — |
| AS | San Francisco (outer) | — |
|  | Bornalle (inner) | — |
|  | Barbafeita (outer) | PC-8 (1) |
|  | Benencia (inner) | PC-3 (1) |
|  | Illa de Ons (outer) | — |
|  | Tulla (inner) | — |
|  | Illas Cíes (outer) | — |
|  | Con de Pego (inner) | — |
| SP | Armaçao de Pêra | PC-1 (2), PC-5 (1), PC-8 (1) |

BI: British Isles. AF: Atlantic France. AS: Atlantic Spain. SP: Southern Portugal. (outer): outer-zone of the Ría. (inner): inner-zone of the Ría.
